# Supplementary material for: The 2017 human monkeypox outbreak in Nigeria—Report of outbreak experience and response in the Niger Delta University Teaching Hospital, Bayelsa State, Nigeria
Source: PLoS One. 2019 Apr 17;14(4):e0214229. doi: 10.1371/journal.pone.0214229 (PMC6469755; doi:10.1371/journal.pone.0214229)
Supplement: S1 Table — (XLSX) [file pone.0214229.s001.xlsx]

## Sheet: Sheet1
S/N	Age	Gender	Occupation	Rash	Fever	Vomiting or nausea	Cough	LymphadeNopathy	Chills or sweats	Sore throat	Oral ulcers	Headache	Lesions that itch	Myalgia	Malaise	Conjunctivitis	Genital Ulcers	Sensitivity to light	Classification
1	41	Male	Business	Yes	Yes	Yes	Yes	No	Yes	No	Yes	no	Yes	Yes	Yes	No	Yes	No	Monkeypox
2	11	Male	Student	Yes	Yes	Yes	No	Yes	No	No	Yes	No	yes	No	Yes	No	No	No	Monkeypox
3	9	Male	Student	Yes	Yes	No	Yes	Yes	No	Yes	Yes	No	Yes	No	Yes	Yes	No	No	Monkeypox
4	6	Male	Student	Yes	Yes	No	No	No	Yes	Yes	Yes	Yes	Yes	Yes	Yes	Yes	No	No	Monkeypox
5	33	Female	Self employed	Yes	No	No	No	No	No	No	No	No	No	No	No	No	No	No	Monkeypox
6	43	Male	Farmer	Yes	Yes	No	No	Yes	Yes	Yes	Yes	No	Yes	No	Yes	No	Yes	No	Monkeypox
7	27	Female	Student	Yes	Yes	No	No	Yes	Yes	Yes	Yes	Yes	No	Yes	Yes	No	Yes	Yes	Monkeypox
8	23	Male	Student	Yes	Yes	No	No	Yes	Yes	No	Yes	No	yes	No	Yes	No	Yes	No	Monkeypox
9	28	Male	Student	Yes	Yes	No	No	Yes	Yes	Yes	No	Yes	Yes	No	No	Yes	No	Yes	Monkeypox
10	34	Male	Self employed	Yes	Yes	No	No	yes	Yes	no	Yes	yes	no	No	Yes	No	Yes	No	Monkeypox
11	30	Male	Business	Yes	Yes	Yes	Yes	Yes	Yes	Yes	Yes	Yes	Yes	No	Yes	Yes	Yes	Yes	Monkeypox
12	29	Female	Busness	Yes	Yes	No	No	Yes	Yes	No	Yes	Yes	Yes	Yes	Yes	No	Yes	No	Monkeypox
13	29	Male	Trader	Yes	Yes	No	No	yes	Yes	No	No	no	yes	No	Yes	No	Yes	No	Monkeypox
14	29	Male	Health worker	Yes	Yes	No	No	yes	Yes	Yes	No	Yes	yes	No	Yes	No	No	No	Monkeypox
15	25	Male	Student	Yes	Yes	No	No	No	No	no	yes	yes	No	No	No	No	No	No	Monkeypox
16	17	Male	Student	Yes	Yes	No	No	No	No	No	no	Yes	no	No	No	No	No	No	Monkeypox
17	20	Male	Artisan	Yes	Yes	No	No	No	No	no	no	no	No	No	No	No	No	No	Monkeypox Chikenpox positive
18	22	Male	Chemist	Yes	Yes	No	Yes	Yes	Yes	Yes	No	Yes	Yes	No	Yes	No	Yes	No	Monkeypox Chikenpox positive
19	39	Female	Business	Yes	No	No	No	No	No	No	no	Yes	Yes	No	No	No	No	No	Missing
20	45	Male	Business	Yes	Yes	No	No	No	No	No	No	No	Yes	No	No	No	No	No	Missing
21	31	Male	Business	Yes	Yes	No	No	Yes	Yes	Yes	No	Yes	No	Yes	No	No	Yes	No	Missing
